# Supplementary material for: Optoelectronic, femtosecond nonlinear optical properties and excited state dynamics of a triphenyl imidazole induced phthalocyanine derivative
Source: Royal Society of Chemistry journal article supplement (doi:10.1039/c9ra07758h), 2019-01-01
Supplement: c9ra07758h1.pdf [file c9ra07758h1.pdf]

# Supporting Information for

## Optoelectronic, Femtosecond Nonlinear Optical Properties and Excited State Dynamics of a Triphenyl Imidazole Induced Phthalocyanine Derivative

Somdatta Bhattacharya,<sup>a</sup> Chinmoy Biswas,<sup>b</sup> Sai Santosh Kumar Raavi,<sup>b</sup> Jonnadula Venkata Suman Krishna,<sup>c</sup> Devulapally Koteswar,<sup>c</sup> Lingamallu Giribabu\*,<sup>c,d</sup> and Soma Venugopal Rao\*,<sup>a</sup>

<sup>a</sup>Advanced Center for Research in High Energy Materials (ACRHEM), University of Hyderabad, South Campus, University of Hyderabad, Hyderabad 500046, Telangana, India.

<sup>b</sup>Ultrafast Photophysics and Photonics Laboratory, Department of Physics, Indian Institute of Technology Hyderabad, Kandi 502285, Hyderabad, Telangana, India.

<sup>c</sup>Polymers & Functional Materials Division, Tarnaka, CSIR-Indian Institute of Chemical Technology, Hyderabad 500007, Telangana, India.

<sup>d</sup>Academy of Scientific and Innovative Research (AcSIR), Anusandhan Bhawan, 2 Rafi Marg, New Delhi, 110001, India

\*Authors for Correspondence: [giribabu\\_l@yahoo.com](mailto:giribabu_l@yahoo.com) (Lingamallu Giribabu), [soma\\_venu@uohyd.ac.in](mailto:soma_venu@uohyd.ac.in) (Soma Venugopal Rao)

### Table of Contents

| S. No. |                                                                                                                                      | Page No. |
|--------|--------------------------------------------------------------------------------------------------------------------------------------|----------|
| 1      | Figure S1: ESI-MS of PBIPN                                                                                                           | S2       |
| 2      | Figure S2: <sup>1</sup> H NMR of PBIPN                                                                                               | S2       |
| 3      | Figure S3: FT-IR of PBIPN                                                                                                            | S3       |
| 4      | Figure S4: MALDI-TOF of PBIPC                                                                                                        | S3       |
| 5      | Figure S5: FT-IR of PBIPC                                                                                                            | S4       |
| 6      | Figure S6: Absorption spectrum PBIPC in DMF (low concentration).                                                                     | S4       |
| 7      | Figure S7: Absorption spectral changes of PBIPC in DCM at different concentrations                                                   | S5       |
| 8      | Figure S8: Theoretical absorption spectra of PBIPC by using B3LYP method PCM model in tetrahydrofuran solvent with M06-2X function.  | S5       |
| 9      | Figure S9: Fluorescence decay signals of PBIPC in different solvents. Solid line is a fit to the experimental data.                  | S6       |
| 10     | Figure S10: Optimized structure of PBIPC and minimum energy in kcal/mol by using B3LYP method 6-31G(d,p).                            | S6       |
| 11     | Table S1: Optimized energies, HOMO-LUMO energies and ground state dipole moment by DFT studies by using B3LYP/6-31G (d,p) in vacuum. | S7       |
| 12     | Table S2: Singlet excited state properties of PBIPC by B3LYP method and M06-2X function in tetrahydrofuran solvent in PCM model.     | S7       |

|    |                                                                                           |     |
|----|-------------------------------------------------------------------------------------------|-----|
| 13 | Z-scan data fit formulae with examples.                                                   | S7  |
| 14 | <b>Figure S11:</b> Schematic of the fs-TAS setup used for photophysical studies of PBIPC. | S10 |
| 15 | <b>Table S3:</b> Decay lifetimes of PBIPC at different wavelengths for fs-TAS.            | S10 |

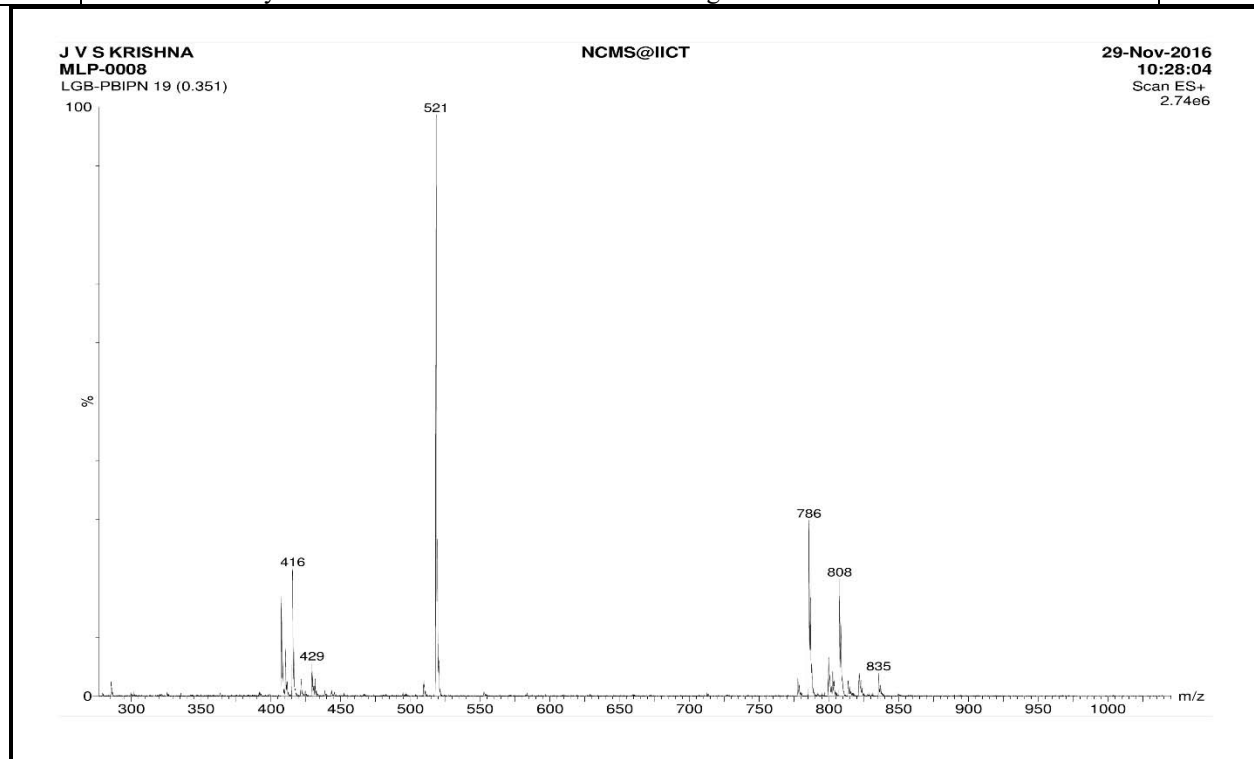

**Figure S1.** ESI-MS of PBIPN

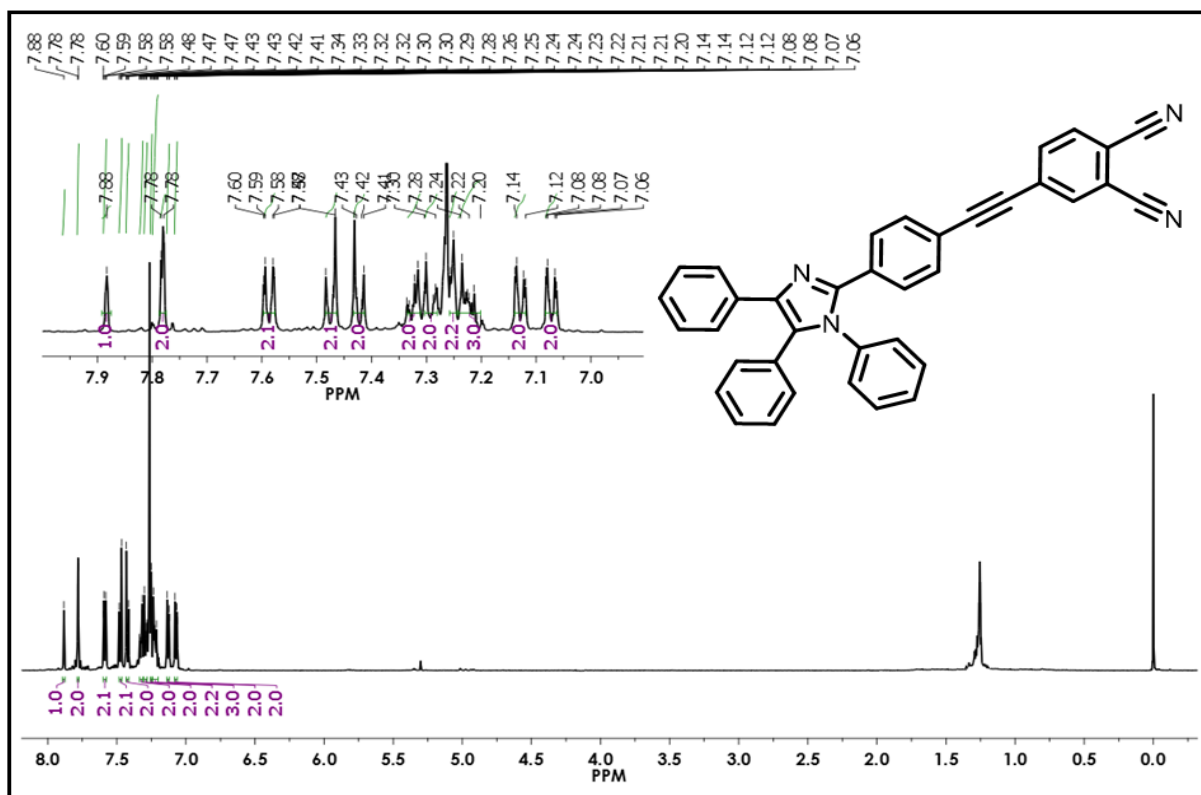

Figure S2. <sup>1</sup>H NMR of PBIPN

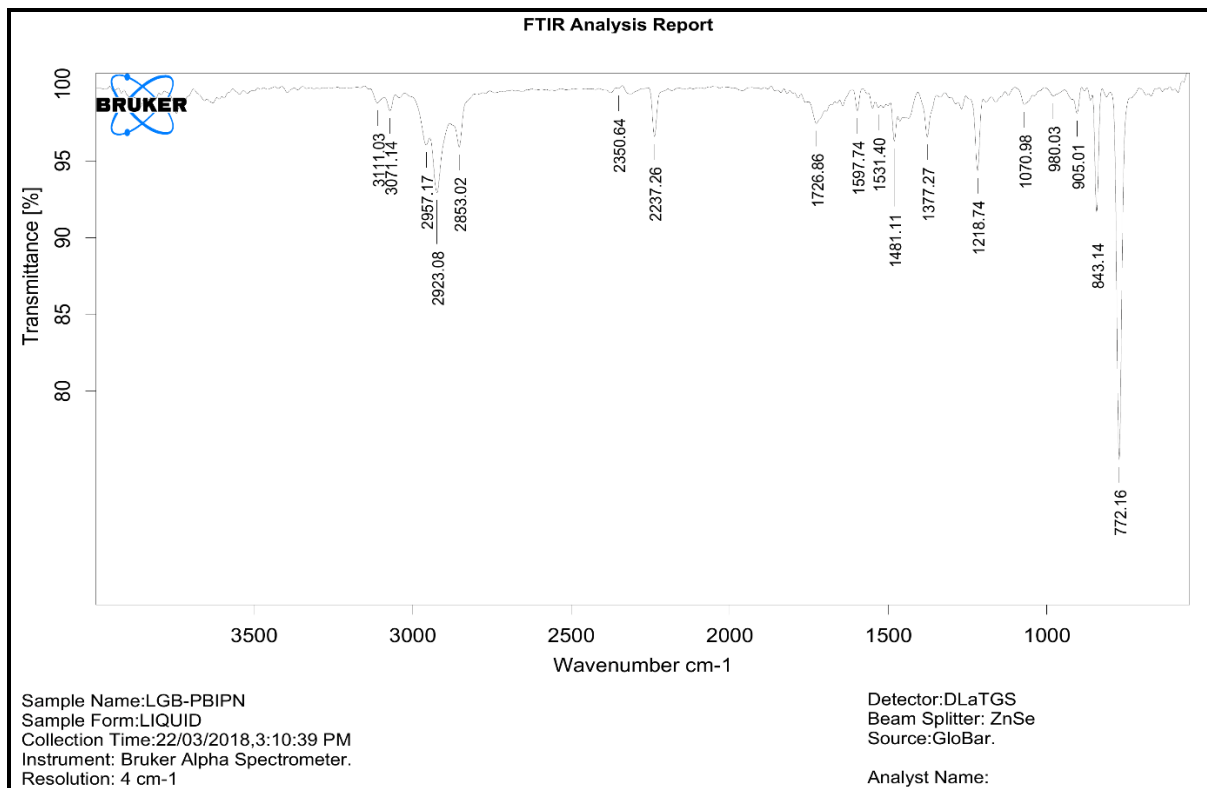

Figure S3. FT-IR of PBIPN

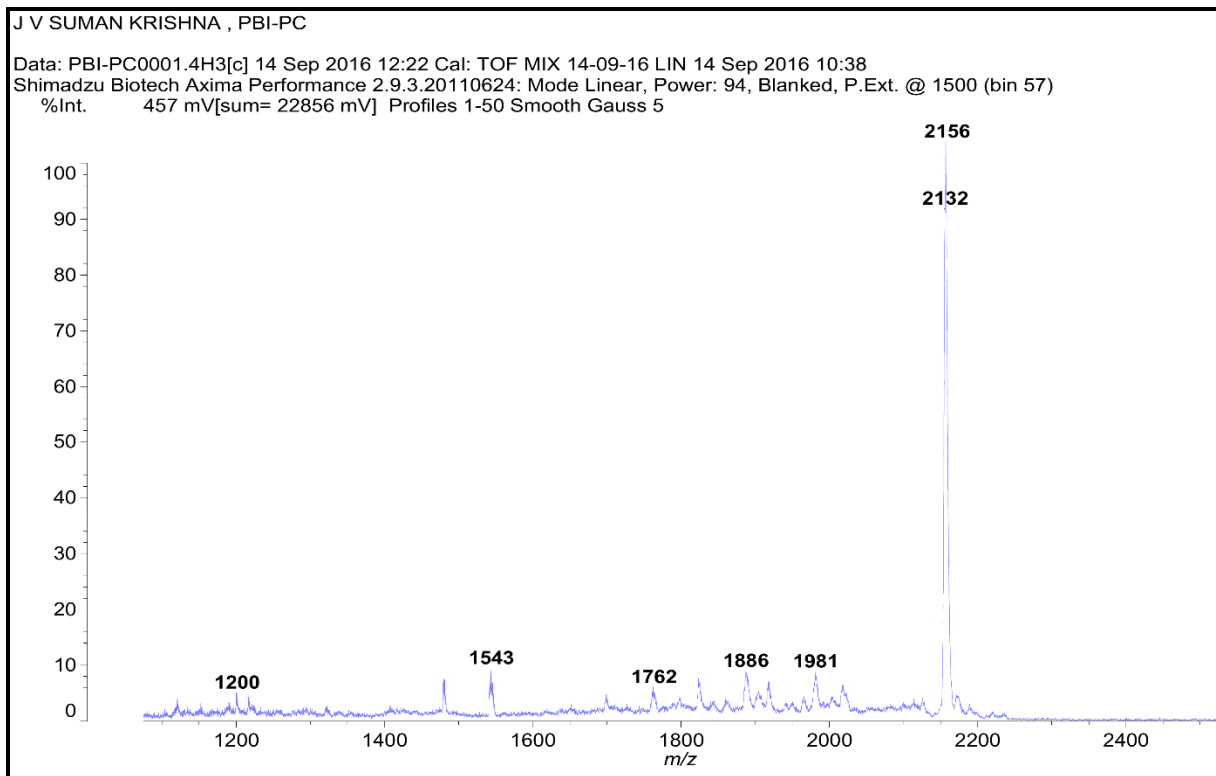

Figure S4. MALDI-TOF of PBIPC

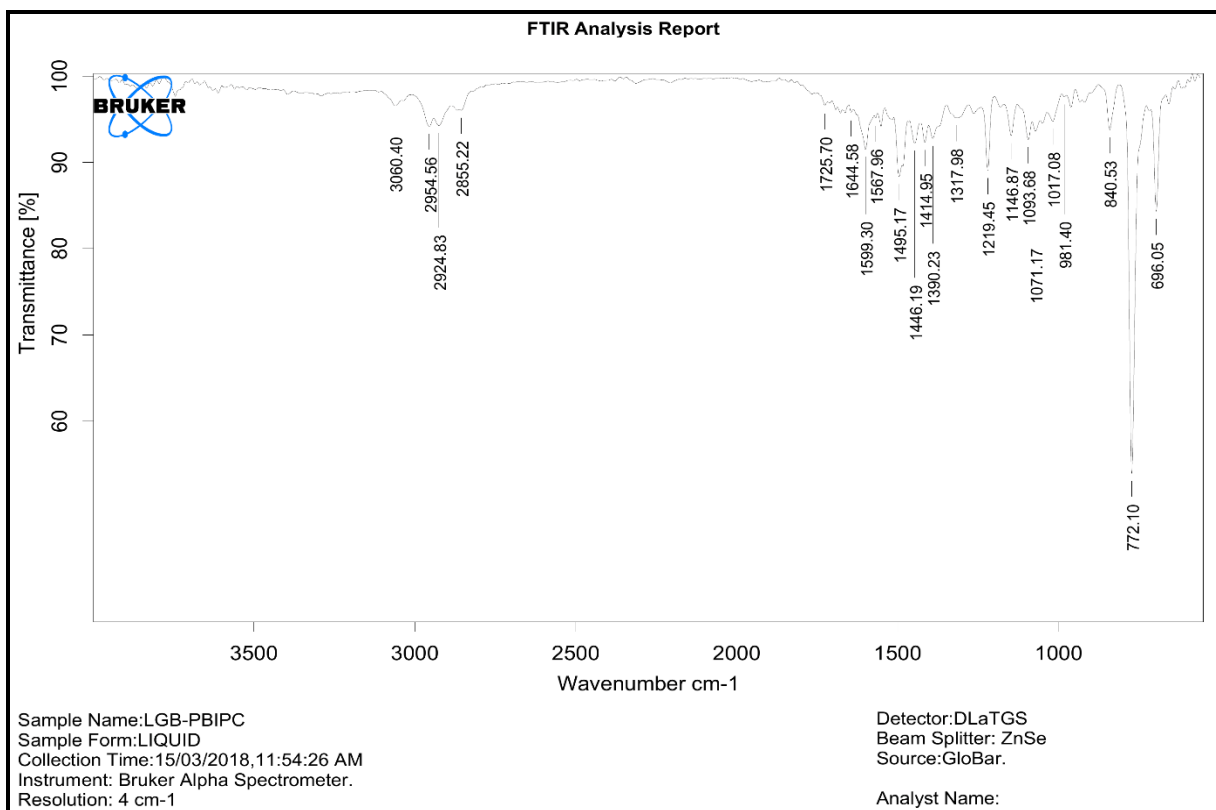

Figure S5. FT-IR of PBIPC

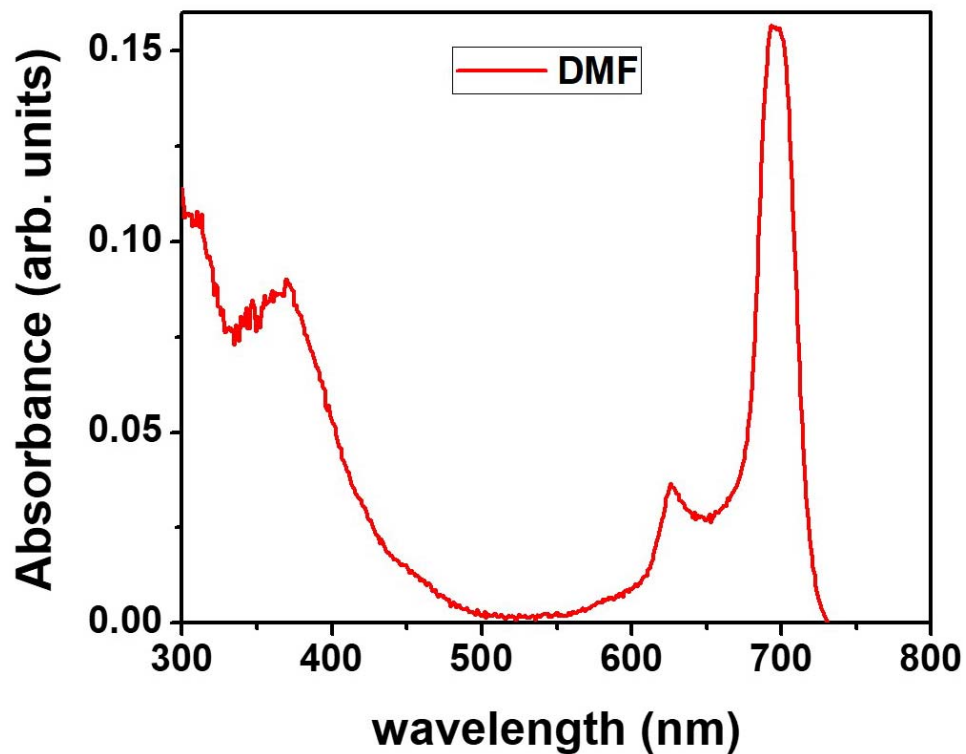

Figure S6. Absorption spectrum of PBIPC in DMF solvent (low concentration).

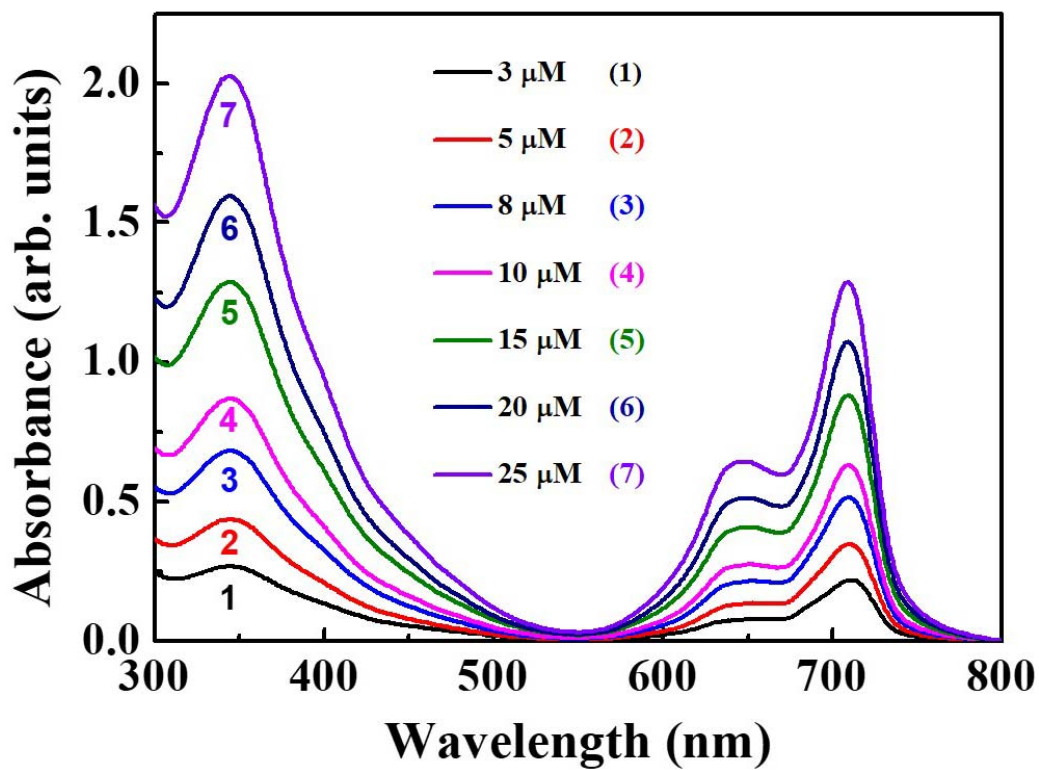

Figure S7. Absorption spectral changes of PBIPC in DCM at different concentrations: 3  $\mu\text{M}$  (b) 5  $\mu\text{M}$  (c) 8  $\mu\text{M}$  (d) 10  $\mu\text{M}$  (e) 20  $\mu\text{M}$  (f) 25  $\mu\text{M}$

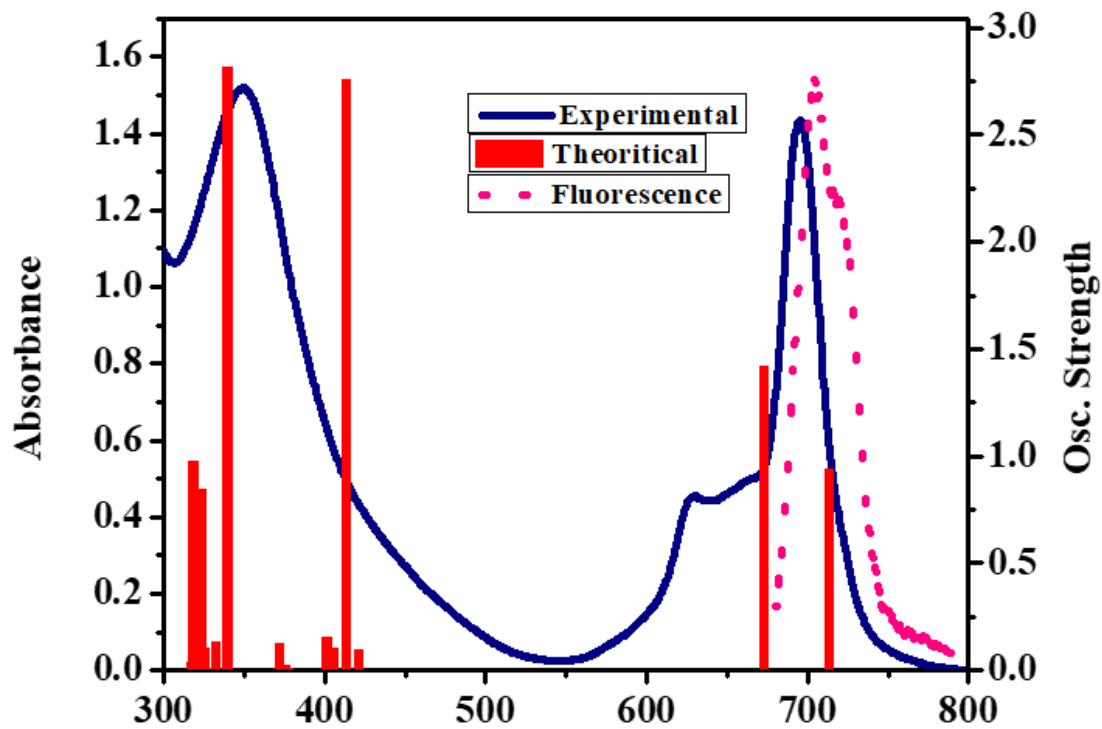

**Figure S8.** Absorption (left) and emission (right) spectra of **PBIPC** in the THF solvent. Simulated absorption bands are shown as vertical bars.

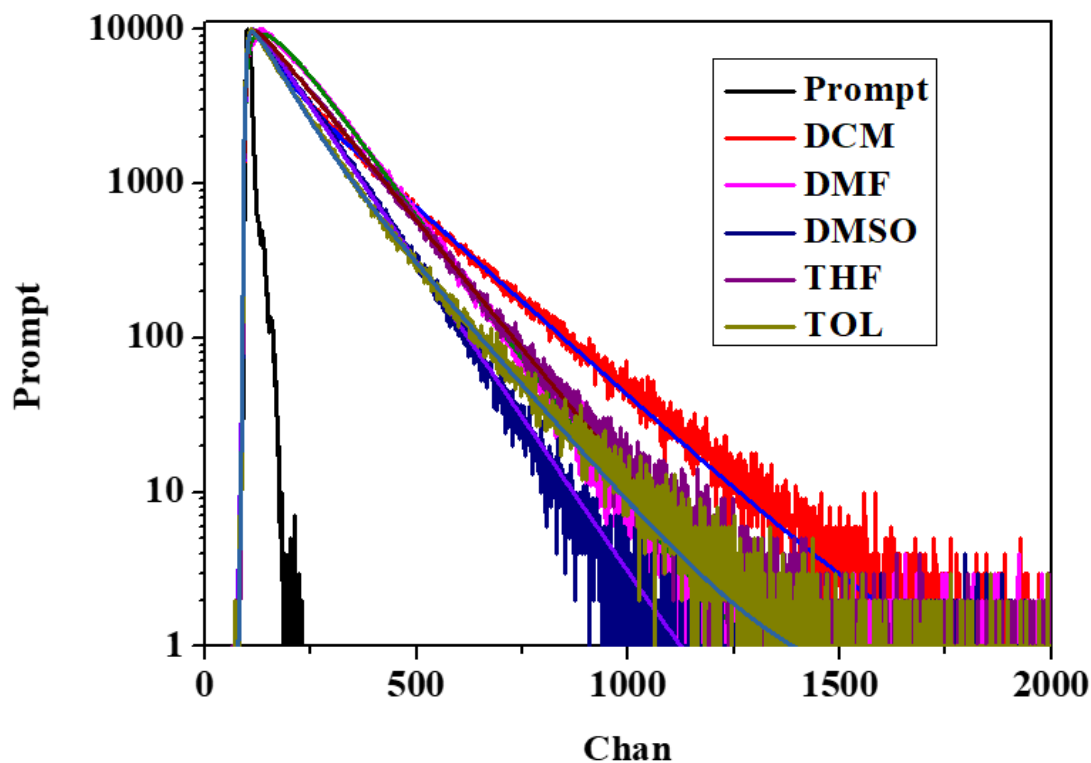

**Figure S9.** Fluorescence decay signals of **PBIPC** in different solvents. Solid lines are fits to the experimental data.

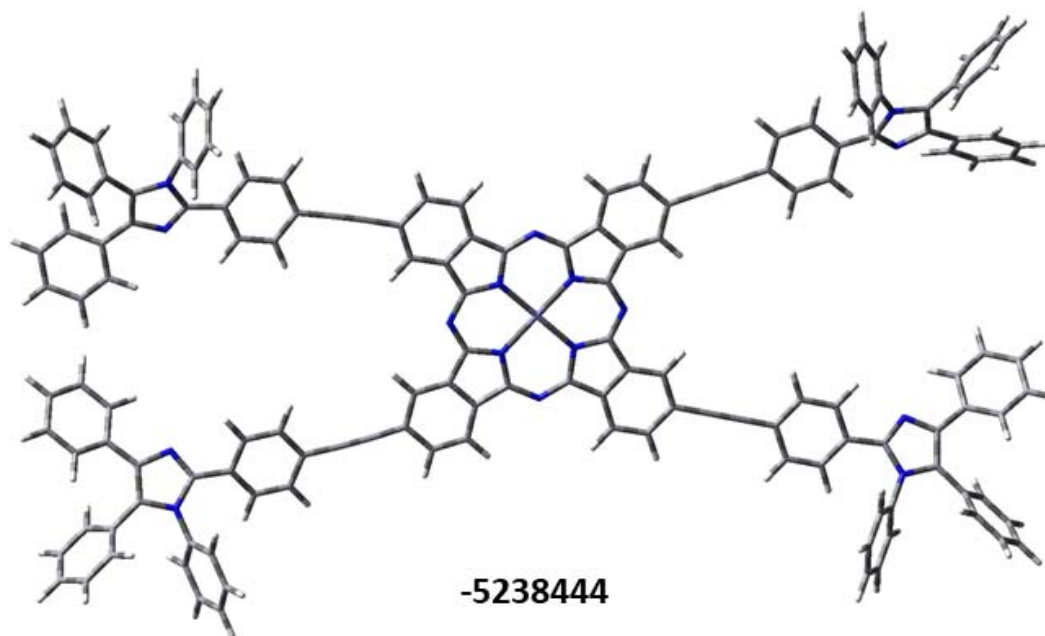

**Figure S10.** Optimized structure of **PBIPC** and minimum energy in kcal/mol by using B3LYP method 6-31G(d,p).

**Table S1.** Optimized energies, HOMO-LUMO energies and ground state dipole moment by DFT studies by using B3LYP/6-31G (d,p) in vacuum.

| Sample       | E<br>Kcal/mol | HOMO (H)<br>eV | LUMO (L)<br>eV | H-L gap<br>eV | $\mu$  |
|--------------|---------------|----------------|----------------|---------------|--------|
| <b>PBIPC</b> | -5238444      | -4.830         | -2.871         | -1.959        | 7.7584 |

**Table S2.** Singlet excited state properties of **CBZPC1** and **CBZPC2** obtained by B3LYP method and M06-2X function in tetrahydrofuran solvent in PCM model.

| Dye          | <sup>a</sup> $\lambda_{\text{max}}$ | <sup>b</sup> f | <sup>c</sup> E (eV) | % of Molecular Orbital Contribution                                                                                            |
|--------------|-------------------------------------|----------------|---------------------|--------------------------------------------------------------------------------------------------------------------------------|
| <b>PBIPC</b> | 677                                 | 0.9429         | 1.867               | HOMO->LUMO (95%)                                                                                                               |
|              | 622                                 | 1.4177         | 1.974               | HOMO->L+1 (94%)    H-18->LUMO (2%)                                                                                             |
|              | 392                                 | 0.1049         | 3.156               | H-3->LUMO (52%)    H-7->LUMO (7%), H-6->LUMO (5%), H-6->L+1 (4%), H-5->LUMO (2%), H-2->L+1 (4%), H-1->LUMO (5%), H-1->L+1 (5%) |

<sup>a</sup>Theoretical absorbance in nm, <sup>b</sup>Oscillator strength, and <sup>c</sup>Excited state energy in eV.

### Z-scan data fit formulae:

Open aperture transmittance:

$$T_{\text{nOA}} = \frac{1}{\left[ 1 + (n-1)\alpha_n L' \left[ \frac{I_0}{\left(1 + \frac{z}{z_0}\right)^2} \right]^{(n-1)} \right]^{\frac{1}{(n-1)}}} \quad \text{Eqn. 1}$$

Where  $n = 1, 2, \dots, n$ ;  $\alpha_n = n$  photon absorption co-efficient; Effective length,

$I_0$  = input peak intensity;  $z_0$  = Rayleigh range at wavelength  $\lambda$  (nm).

$$L' = 1 - \frac{e^{-(n-1)\alpha_n L}}{(n-1)\alpha_n}$$

Closed aperture transmittance:

$$T_{\text{CA}} = 1 \pm \frac{4\Delta\phi \left(\frac{z}{z_0}\right)}{\left[\left(\frac{z}{z_0}\right)^2 + 9\right] \left[\left(\frac{z}{z_0}\right)^2 + 1\right]} \quad \text{Eqn. 2}$$

$\Delta\phi$  is obtained from fitted curve and then nonlinear refractive index  $n_2$  is calculated as:

$$n_2 = \frac{\Delta\phi \lambda}{2\pi L' I_0} \quad \text{Eqn. 3}$$

The third order non linear susceptibility,  $\chi^{(3)} = [(\chi_R^{(3)})^2 + (\chi_I^{(3)})^2]^{1/2}$

$$\chi_R^{(3)} = 2cn_0^2 \varepsilon_0 n_2 \quad \text{Eqn. 4}$$

$$\chi_I^{(3)} = \frac{c^2 \varepsilon_0 n_0^2 \alpha_2}{\omega}$$

Where,  $c = 3 \times 10^8$  m/s;  $\varepsilon_0$  = absolute permittivity;  $\omega$  = frequency of laser radiation. The n-photon absorption cross-sections are calculated as:

$$\sigma_n = \frac{(\hbar\omega)^{n-1}}{N} \alpha_n \quad \text{Eqn. 5}$$

$N$  = solute molecule concentration.

**Example:** For **800 nm**, the average power used was 0.4 mW with beam radius of 1 mm and focusing lens of 10 cm focal length. Thus, the Rayleigh range,  $Z_0$  was calculated to be 2.54 mm.

Effective length, 
$$L' = \frac{1 - e^{-0.354}}{0.354} \text{ cm} = 0.084$$

Peak intensity,

$$I_0 = \frac{0.4 \times 10^{-3}}{\pi \times (0.0025)^2 \times 70 \times 10^{-15} \times 10^3} \frac{\text{W}}{\text{cm}^2} = 2.8 \times 10^{11} \text{ W/cm}^2$$

For 800 nm, we observe two-photon absorption hence,  $n = 2$ . Putting above parameters in Eqn. 1, we fit it with experimental open aperture z-scan data to obtain NLO absorption coefficient,  $\alpha_2$  to be  $12.0 \times 10^{-11} \text{ cm}^2/\text{W}$ . Similarly, from Eqn. 2, we can obtain the value of  $\Delta\Phi$  which was obtained to be 0.17. Putting this value to Eqn. 3, the nonlinear refractive index obtained was:

$$n_2 = \frac{0.17 \times 8 \times 10^{-5}}{2\pi \times 0.084 \times 2.8 \times 10^{11}} = 0.92 \times 10^{-16} \text{ cm}^2/\text{W}$$

Using Equation 4 the value of NLO susceptibilities were calculated and tabulated in Table 2.

The two-photon absorption cross-section was calculated using equation 5 where no. of molecules in 0.07 mM of sample is given by,

$$N = 0.07 \times 10^{-3} \times 6.02 \times 10^{23} = 4.21 \times 10^{19} \text{ Molecules.}$$

Thus, 2PA cross-section was calculated as,

$$\sigma_2 = \frac{6.62 \times 10^{-34} \times 3 \times 10^8 \times 12 \times 10^{-11}}{8 \times 10^{-7} \times 4.21 \times 10^{14} \times 10^{-3}} = 7.08 \times 10^{-47} \text{ cm}^4 \text{ s photon}^{-1} \text{ molecule}^{-1}$$

$$= 7080 \text{ GM}$$

$$1 \text{ GM} = 10^{-50} \text{ cm}^4 \text{ s photon}^{-1} \text{ molecule}^{-1}$$

For  $\lambda = 1000 \text{ nm}$ , the average power taken was 0.75 mW with Rayleigh range of 3.18 mm. This effective length calculated was 0.072 cm. Rest of the parameters were same as  $\lambda = 800 \text{ nm}$ .

Peak intensity,

$$I_0 = \frac{0.75 \times 10^{-3}}{2\pi \times 70 \times 10^{-15} \times 10^3 \times \pi \times (0.0038)^2} = 3.36 \times 10^{11} \text{ W/cm}^2$$

For 1000 nm, we observe three-photon absorption hence,  $n = 3$ . Putting above parameters in Eqn. 1, we fit it with experimental open aperture z-scan data to obtain NLO absorption coefficient,  $\alpha_3$  to be  $2.7 \times 10^{-21} \text{ cm}^3/\text{W}^2$ . Similarly, from Eqn. 2, we can obtain the value of  $\Delta\Phi$  which was obtained to be 2.8. Putting this value to Eqn. 3, the nonlinear refractive index obtained was:

$$n_2 = \frac{2.8 \times 10^{-4}}{2\pi \times 3.36 \times 10^{11} \times 0.072} = 18.4 \times 10^{-16} \text{ cm}^2/\text{W}$$

The three-photon cross section obtained using equation 5 was,

$$\sigma_2 = \frac{(6.62 \times 10^{-34} \times 3 \times 10^8)^2 \times 2.7 \times 10^{-21}}{(10^{-6})^2 \times 4.21 \times 10^{19}} \text{ cm}^6 \text{ s}^2$$

$$= 2.53 \times 10^{-78} \text{ cm}^6 \text{ s}^2$$

For  $\lambda = 1500 \text{ nm}$ , the average power taken was 0.7 mW with Rayleigh range of 4.7 mm. This effective length calculated was 0.08 cm. Rest of the parameters were same as  $\lambda = 800 \text{ nm}$ .

Peak intensity,

$$I_0 = \frac{0.75 \times 10^{-3}}{\pi \times (0.0047)^2 \times 70 \times 10^{-15} \times 10^3} = 1.4 \times 10^{11} \text{ W/cm}^2$$

For 1500 nm, we observe four-photon absorption hence,  $n = 4$ . Putting above parameters in Eqn. 1, we fit it with experimental open aperture z-scan data to obtain NLO absorption coefficient,  $\alpha_4$  to be  $2.2 \times 10^{-32} \text{ cm}^5/\text{W}^3$ . Similarly, from Eqn. 2, we can obtain the value of  $\Delta\Phi$  which was obtained to be 1.35. Putting this value to Eqn. 3, the nonlinear refractive index obtained was:

$$n_2 = \frac{1.35 \times 1500 \times 10^{-7}}{2\pi \times 0.08 \times 1.4 \times 10^{11}} = 28.9 \times 10^{-16} \text{ cm}^2/\text{W}$$

The four-photon cross section obtained using equation 5 was,

$$\sigma_2 = \left( \frac{6.62 \times 10^{-34} \times 3 \times 10^8}{1500 \times 10^{-9}} \right)^3 \times \left( \frac{2.2 \times 10^{-32}}{4.21 \times 10^{19}} \right) \text{ cm}^8/\text{s}^3$$

$$= 12.13 \times 10^{-108}$$

### Femtosecond Transient Absorption Spectroscopy experimental schematic:

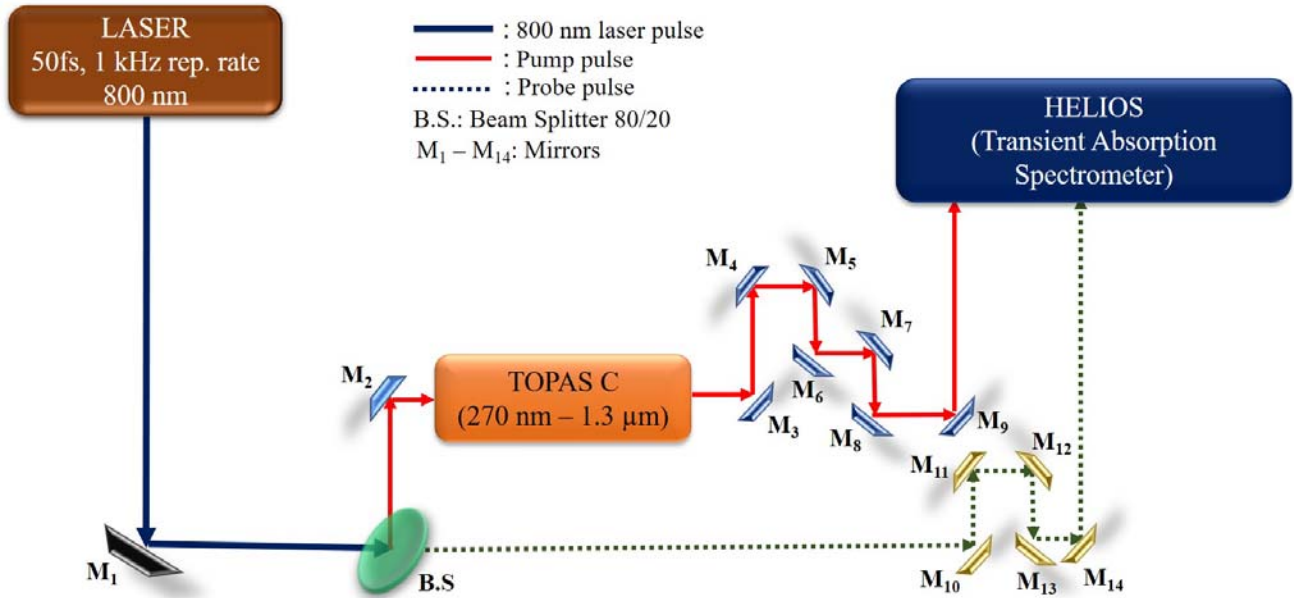

**Figure S11.** Schematic of the fs-TAS setup used for photophysical studies of PBIPC at ACRHEM, University of Hyderabad, India.

**Table S3.** Decay lifetimes of relaxation dynamics in PBIPC for different wavelengths.

| Excitation wavelength | Peak maxima | $\tau_R$ (ps) | $\tau_1$ (ps), $\tau_2$ (ps) | $\tau_3$ (ps) |
|-----------------------|-------------|---------------|------------------------------|---------------|
| 400 nm                | 532 nm      | 0.131         | 5.59, 333.9                  | 1300          |
|                       | 640 nm      | 0.123         | 21.02                        | 346           |
|                       | 700 nm      | 0.241         | 8.60                         | 1286          |
| 650 nm                | 532 nm      | 1.36          | 8, 216.3                     | 1403          |
|                       | 640 nm      | 1.39          | 3.62                         | 408           |
|                       | 698 nm      | 1.32          | 142                          | 1340          |

$\tau_R$ : Rise time;  $\tau_1$  / $\tau_2$ : shorter decay component showing IC and/ or VC;  $\tau_3$ : longer decay component showing ISC. Error involved is  $\pm 10\%$ .
